# Supplementary material
Source: PubMed Central journal article supplement (PMC9810388)
Supplement: NIHMS957581-supplement-1.pdf [file NIHMS957581-supplement-1.pdf]

538 **Supplementary data:**

539

540 Supplementary table 1: Target regions of NGS assay

| <b>Gene</b>   | <b>Exon / Amino Acid (AA) Coverage</b>                                                                                                                                  |
|---------------|-------------------------------------------------------------------------------------------------------------------------------------------------------------------------|
| <b>ASXL1</b>  | Exons 1-12 (AA 4-1542 except 8-13, 75-77, 238-239, 628-634, 639-643, 738-741, 840, 940, 1263-1268)                                                                      |
| <b>CBL</b>    | Exon 1-16 (AA 1-907 except 55-57, 198-199, 410-413, 476-477)                                                                                                            |
| <b>CEBPA</b>  | Exon 1 (AA 37-15, 106-304, 314-376, 380-381, 385-396)                                                                                                                   |
| <b>DNMT3A</b> | Exons 2-22 (AA 1- 866 except 12-24, 57-59, 150-164, 286-287, 339, 428-429, 477-492, 581, 618-624) Exon 23 (AA 866-913)                                                  |
| <b>ETV6</b>   | Exons 2-8 (AA 12-453 except 338-339, 411-412)                                                                                                                           |
| <b>EZH2</b>   | Exons 2-20 (AA 1-752 except 74-82, 242, 265-266, 274-276, 386-388, 415, 502-516, 705-707)                                                                               |
| <b>FLT3</b>   | Exon 20 (AA 807-847), Exons 1-24 (AA1-994 <b>except 8-14</b> , 31-32, 122, 344-345, 438-440, 534-535, 805-847, 850-853, 886-887)                                        |
| <b>IDH1</b>   | Exon 3-9 (AA 1-381 except 42-138, 154-161, 197-200) Exon 4 (AA 41-138)                                                                                                  |
| <b>IDH2</b>   | Exon 1-11 (AA 1-453 except 126-178, 361-363) Exon 4 (AA 125-178)                                                                                                        |
| <b>JAK1</b>   | Exons 2-25 (AA 1-1155 except 3-5, 81-86, 329-330, 358-361, 549, 1020-1021)                                                                                              |
| <b>JAK2</b>   | Exon 14 (AA 593-622), Exons 3-25 (AA 1-1133 except 151, 265-266, 349-350, 443, 593-664, 743-747, 858-859)                                                               |
| <b>JAK3</b>   | Exons 2-23 (AA 1-1069 except 255, 259-263, 301-303, 419-426, 482-484, 522-523, 601-602, 728-733)                                                                        |
| <b>KIT</b>    | Exons 1-21 (AA 1-977 except 112, 546-549, 660-663, 767-773, 777-783, 788-828) Exon 17 (AA 788-828)                                                                      |
| <b>MPL</b>    | Exon 10 (AA 493-522)                                                                                                                                                    |
| <b>NPM1</b>   | Exon 11 (AA 283-295)                                                                                                                                                    |
| <b>KRAS</b>   | Exons 2-4 (AA 1-150)                                                                                                                                                    |
| <b>NRAS</b>   | Exons 2-4 (AA 1-150)                                                                                                                                                    |
| <b>PHF6</b>   | Exons 2-10 (AA 1-366 except 47-80, 166-169)                                                                                                                             |
| <b>PTEN</b>   | Exons 1-9 (AA 1-404 except 108-113, 343-404)                                                                                                                            |
| <b>RUNX1</b>  | Exons 4-9 (AA 33-481 except 202-204, 210-214, 353-357)                                                                                                                  |
| <b>SF3B1</b>  | Exons 1-25 (AA 1-1305 except 299-301, 303-307, 311-312, 574-577, 603-607)                                                                                               |
| <b>SH2B3</b>  | Exons 2-8 (AA 1-576 except 92-128, 169-197, 183-186, 193-197, 310-314, 413)                                                                                             |
| <b>SUZ12</b>  | Exons 1-16 (AA 1-740 except 219-224, 303-306, 599-625, 683)                                                                                                             |
| <b>TET1</b>   | Exons 2-12 (AA 1-2137 except 324-325, 523-525, 599-601, 637-638, 824-826, 922-923, 988-989, 1160-1161, 1423-1425, 1963, 2096-2097)                                      |
| <b>TET2</b>   | Exons 3-11 (AA 2-2003 except 251-254, 510-514, 686-687, 807-808, 877-881, 1164-1166, 1254, 1263-1264, 1349-1354, 1390-1394, 1570-1572, 1668-1674, 1677-1682, 1844-1845) |
| <b>TP53</b>   | Exons 2-11 (AA 1-394 except 26-32, 45-46, 53, 221-224, 262-265, 301-306, 332-333, 368-369)                                                                              |
| <b>TYK2</b>   | Exons 3-25 (AA 1-1188 except 402-403, 554-556, 592, 650-653, 871-872, 906-912, 963-969, 1107-1109)                                                                      |
| <b>WT1</b>    | Exons 1-10 (AA1-518 except 256, 317-334, 335-338, 443-446)                                                                                                              |

541

542

543 **Supplementary table 2**

544

545 **See Excel sheet with all called variants used in analysis.**

546

Accepted Manuscript

547 Supplementary table 3: 10-color multi-parameter flow panels used to detect MRD

| <b>Tube 1</b>             | <b>Tube 2</b>     | <b>Tube 3</b>     |
|---------------------------|-------------------|-------------------|
| <b>CD15 FITC</b>          | CD64 FITC         | CD7 BB515         |
| <b>CD33 PE</b>            | CD123 PE          | CD56 PE           |
| <b>CD117 PC5</b>          | CD14 PC5          | CD5 PerCP-Cy5.5   |
| <b>CD13 PE-CY7</b>        | CD13 PE-CY7       | CD33 PC7          |
| <b>CD34 APC</b>           | CD34 APC          | CD34 APC          |
| <b>CD71 APC ALEXA700</b>  | CD16 APC ALEXA700 | CD4 APC-ALEXA700  |
| <b>CD38 APC ALEXA 750</b> | CD38 APC ALEXA750 | CD38 APC-ALEXA750 |
| <b>HLA-DR PAC BLUE</b>    | HLA-DR PAC BLUE   | CD2 BV421         |
| <b>CD45 V500C</b>         | CD45 V500C        | CD45 V500c        |
| <b>CD19 BV605</b>         | CD11b BV605       |                   |

548

Accepted Manuscript

549 Supplementary table 4: Induction and consolidation regimens

| <b>Induction chemotherapy regimens</b>     | <b>N (%)</b> |
|--------------------------------------------|--------------|
| 7+3 Daunorubicin                           | 24 (52.1)    |
| 7+3 Idarubicin                             | 17 (36.2)    |
| Hypomethylating agent                      | 2 (4.2)      |
| HIDAC                                      | 1 (2.1)      |
| Unknown                                    | 1 (2.1)      |
| 5+3 Idarubicin                             | 1 (1)        |
| 5+3 Daunorubicin                           | 1 (1)        |
| <b>Consolidation chemotherapy regimens</b> |              |
| No Consolidation                           | 26 (55.3)    |
| HIDAC                                      | 12 (25.5)    |
| IDAC                                       | 6 (12.8)     |
| Hypomethylating agent                      | 2 (4.2)      |
| 5+2 Idarubicin                             | 1 (2.1)      |

550 Table includes only patients (n=47) who had serial NGS performed at diagnosis and

551 immediately before HCT. All 47 patients received induction.

552

553 Supplementary table 5: Ten patients with *NPM1* mutated AML who had NGS  
 554 performed immediately before HCT showing correlation between *NPM1* VAF,  
 555 aberrant blast MRD by MFC and blast quantification by histology.

| <i>NPM</i> mutation | <i>NPM1</i> VAF<br>pre-HCT<br>(%) | Flow MRD<br>(%) | Aspirate Blasts<br>pre-HCT(%) | Transplant outcome |
|---------------------|-----------------------------------|-----------------|-------------------------------|--------------------|
| p.L287fs            | 0                                 | NP              | <5                            | Alive              |
| p.L287fs            | 0                                 | 1.5             | <5                            | TRM                |
| p.L287fs            | 0                                 | 0.35            | <5                            | Alive              |
| p.L287fs            | 0                                 | NP              | <5                            | Alive              |
| p.L287fs            | 0                                 | NP              | <5                            | Alive              |
| p.L287fs            | 0                                 | NP              | <5                            | Alive              |
| p.L287fs            | 0.24                              | NP              | <5                            | Alive              |
| p.W288fs            | 6.2                               | 4.3             | 2                             | Relapse            |
| p.L287fs            | 1.78                              | 0.5             | 6                             | Relapse            |
| p.L287fs            | 15.2                              | NP              | 9                             | TRM                |

556 NP: not performed, TRM: treatment related mortality, Alive: alive and in  
 557 remission at last follow-up.  
 558
